# Supplementary material for: Nimotuzumab Site-Specifically Labeled with 89Zr and 225Ac Using SpyTag/SpyCatcher for PET Imaging and Alpha Particle Radioimmunotherapy of Epidermal Growth Factor Receptor Positive Cancers
Source: MDPI journal article supplement (doi:10.3390/cancers12113449), 2020-11-20
Supplement: s1 [file s1]

# Supplementary Materials: Nimotuzumab Site-Specifically Labeled with $^{89}\text{Zr}$ and $^{225}\text{Ac}$ Using SpyTag/SpyCatcher for PET Imaging and Alpha Particle Radioimmunotherapy of Epidermal Growth Factor Receptor Positive Cancers

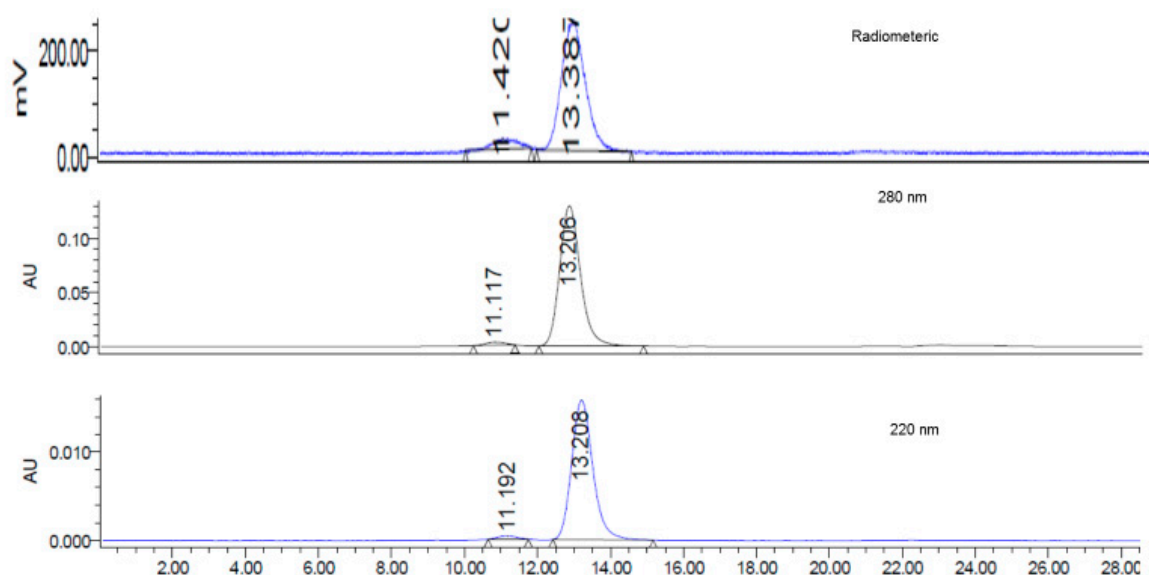

**Figure S1.** Representative size exclusion (SEC) HPLC profile of  $^{89}\text{Zr}$ -nimotuzumab-SpyTag- $\Delta\text{N}$ -SpyCatcher. UV channels at 220 and 280 nm show “cold” antibody and radiometric channel shows the radiolabeled antibody with a purity > 95%.

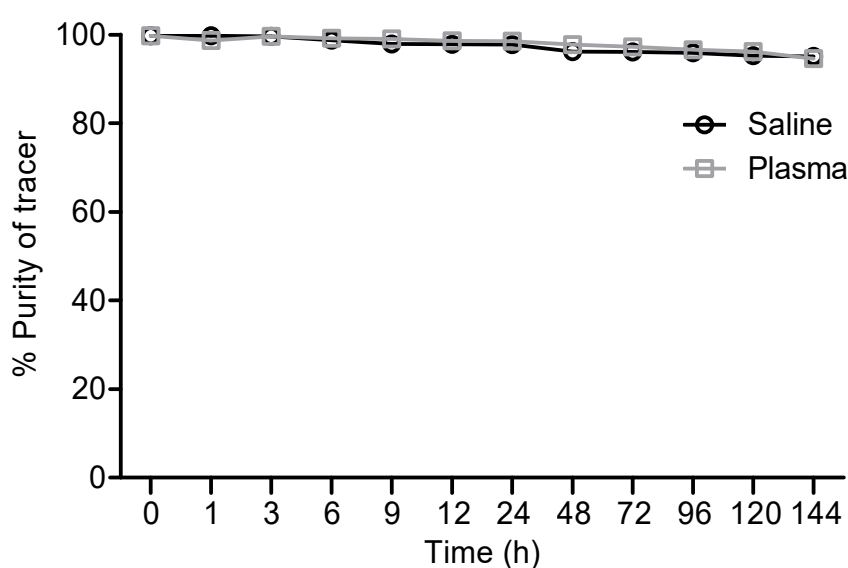

**Figure S2.** Stability of  $^{89}\text{Zr}$ -nimotuzumab-SpyTag- $\Delta\text{N}$ -SpyCatcher in saline and human plasma at 37 °C for different time points.

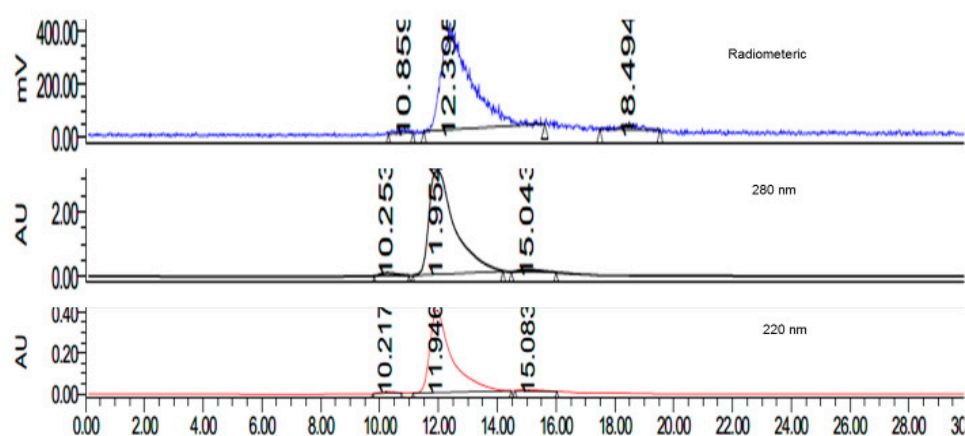

**Figure S3.** Representative size exclusion (SEC) HPLC profile of  $^{225}\text{Ac}$ -nimotuzumab-SpyTag- $\Delta\text{N}$ -SpyCatcher. UV channels at 220 and 280 nm show “cold” antibody and radiometric channel shows the radiolabeled antibody with a purity > 95%.

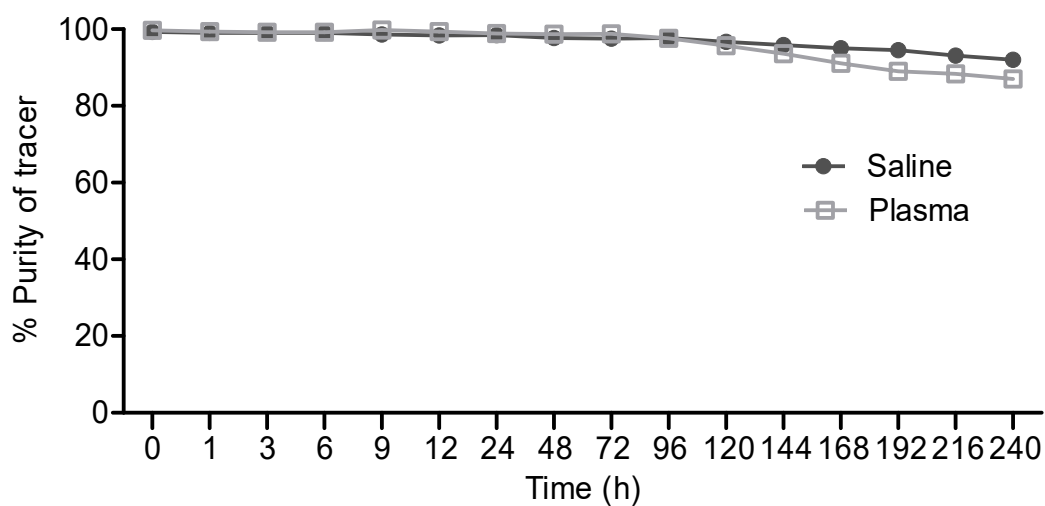

**Figure S4.** Stability of  $^{225}\text{Ac}$ -nimotuzumab-SpyTag- $\Delta\text{N}$ -SpyCatcher in saline and human plasma at 37 °C at different times post incubation.

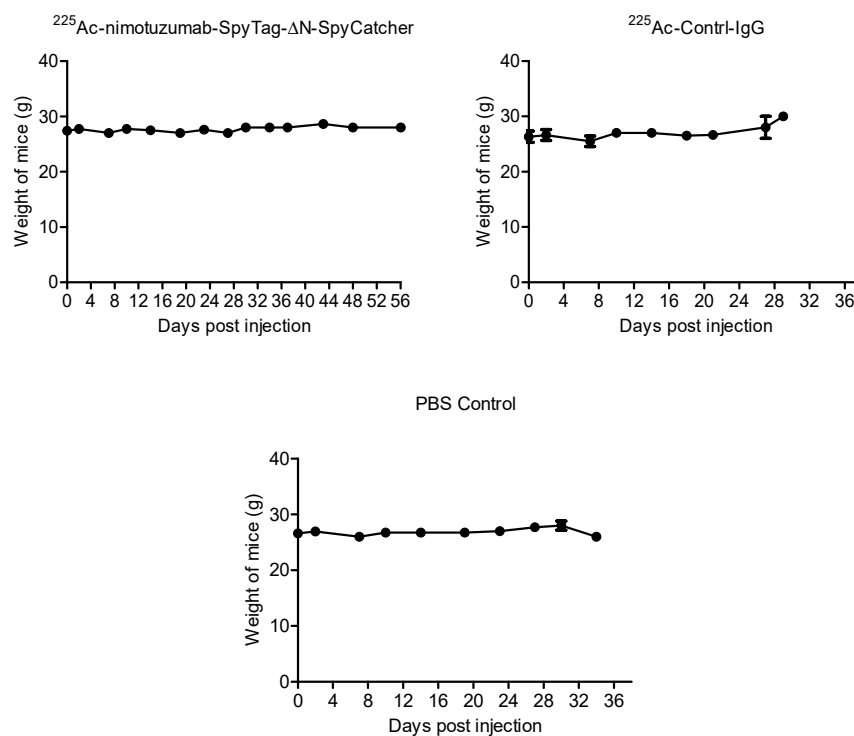

**Figure S5.** Average body weight of mice during treatment for the different groups.

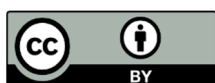

© 2020 by the authors. Licensee MDPI, Basel, Switzerland. This article is an open access article distributed under the terms and conditions of the Creative Commons Attribution (CC BY) license (<http://creativecommons.org/licenses/by/4.0/>).
